# Supplementary material for: Brain Reward System Dysfunction in Adolescence: Current, Cumulative, and Developmental Periods of Depression
Source: Atypon-hosted journal article supplement (doi:10.1176/appi.ajp.2019.19030281), 2020-04-07
Supplement: appi.ajp.2019.19030281.ds001.pdf [file appi.ajp.2019.19030281.ds001.pdf]

## SUPPLEMENTAL METHODS

### Participants

Of the 131 participants, 3 had 14 waves of depression symptom data, 17 had 13 waves, 25 had 12 waves, 36 had 11 waves, 18 had 10 waves, 12 had 5-9 waves, and 20 had <5 waves of data. Moreover, of the 131 participants, 24% met criteria for a current diagnosis of MDD or MDD not otherwise specified, and 49% met criteria for a lifetime diagnosis of MDD. SES was significantly negatively correlated with cumulative and current depression ( $r = -0.23$ ,  $p = 0.01$ ;  $r = -0.28$ ,  $p < 0.01$ , respectively). For cumulative and current depression there were no sex differences ( $F(1,129) = 0.773$ ,  $p = 0.381$ ;  $F(1,127) = 0.088$ ,  $p = 0.767$ , respectively) nor race differences ( $F(2,128) = 2.354$ ,  $p = 0.099$ ;  $F(2,128) = 1.635$ ,  $p = 0.199$ , respectively).

### Depression severity measures

All diagnostic interviews were audiotaped and reviewed for reliability using established methods previously reported (1). Inter-rater reliability among clinicians was high for a diagnosis of depression ( $\kappa = 1.0$ ; ICC = 0.98). In calculating cumulative depression severity, a depression severity score was created by calculating the total number of core symptoms from the major depressive disorder (MDD) module endorsed by the caregiver and/or child during each assessment. Then the area under the curve of the trajectory of these symptoms over their time in the study was calculated.

### Procedure

An event-related card-guessing task was used to assess neural reactivity to anticipation and receipt of reward feedback (2–5). For each trial, participants were asked to guess whether a card (represented by a “?”) was “high” or “low” using a button press (4000ms) and told that they would either win or lose money or neither win or lose money depending on their guess. After guessing, participants received one of four cues (2000ms) indicating they were likely to win (Win cue), lose (Lose cue), either win or lose (Mixed cue), or likely to get neutral feedback indicating no change (Neutral cue). If no response was made, participants viewed a fixation cross for the remainder of the trial. Following the cue, participants saw a fixation cross (jittered 0, 2000, or 4000ms), before receiving feedback (2000ms) that they either won money (Reward outcome), lost money (Loss outcome), or neither won nor lost money (None outcome), followed by a fixation cross (jittered 2000, 4000, or 6000ms). At the end of the task, participants were informed that they had “won” \$17. In total there were two runs of 36 trials each presented in a pseudorandom order lasting about 8.5 minutes each, including 12 trials each of the Win and Lose cues, 6 trials each of the Mixed and Neutral cues, 11 trials each of the Reward and Loss

outcomes, and 14 trials of the None outcome per run. Participants with fewer than five Reward or Loss trials in a run were excluded from analyses ( $n=2$ ).

### **fMRI Analyses**

Functional magnetic resonance imaging data were collected on a Siemens PRISMA 3T scanner with a 32-channel head coil. Participants completed T1- and T2-weighted structural scans ( $0.8\text{mm}^3$ ) in addition to 17 minutes of task-based blood-oxygen-level-dependent (BOLD) scanning across four scans. Task-based scans were acquired using a T2\*-weighted multiband EPI sequence with no gaps between slices (Multiband[MB]=7, 72 axial slices per volume, 2.4mm isotropic voxels, TE=33.1 ms, TR=720 ms, FOV=216 mm, flip=52°, 715 volumes per run for a total of 1430 volumes). T1-weighted structural scans were acquired in the sagittal plane using a magnetization-prepared rapid gradient-echo (MP-RAGE) three-dimensional sequence (TR=2400 ms, TE=2.22 ms, flip angle=8°, 166 slices, field of view=300 x 320 mm, voxel size=0.8x0.8x0.8 mm). Functional magnetic resonance imaging data were run through the Human Connectome Project minimal preprocessing pipelines (6,7). Functional data were corrected for PRISMA scanner gradient distortions, readout distortions and bias field correction using opposing pair spin-echo field maps and rigid body alignment to a single band reference image. Data were co-registered to within subject T1 and resampled to MNI152 2mm isotropic voxels using a single-step resample. Data were finally normalized to a grand mean of 10000. Further preprocessing and analysis was conducted using Analysis of Functional Neuroimages (AFNI) (8). Spatial smoothing with a 6-mm smoothing kernel (FWHM) and linear trend removal were conducted. Each participant's fMRI data was quality controlled by assessing activation in M1 (Brodmann's area 4) to the beginning of the trial while they selected either 'high' or 'low', and in V1 (Brodmann's area 17) to mean activation across all types of cues and across all types of outcomes to assure proper alignment of functional scans with anatomical scans. Percent of relative root mean square (RMS) realignment estimates  $>0.3$  and relative RMS mean (mm) were extracted. Participants with greater than 0.20 root mean square (RMS) realignment estimates were excluded from all analyses ( $n=8$ ). Cluster contiguity was defined as voxels sharing a face (NN=1 in AFNI) with positive and negative clusters separated ("bisided" in AFNI).

### **Psychotropic Medications**

Use of psychotropic medications in the past 48 hours was added to analyses to determine whether results changed substantially, but was not entered as a covariate in the initial analyses due to concerns that it would overcorrect for participants experiencing severe levels of depression, who are more likely to be using psychotropic medications to manage their symptoms. In fact, both current and cumulative depression severity significantly related to use of psychotropic medications ( $\beta = 0.139$ , 95% CI = (0.088, 0.190),  $p < 0.001$ ; ( $\beta = 0.120$ , 95% CI = (0.068, 0.171),  $p < 0.001$ , respectively). Findings did not meaningfully differ when accounting for psychotropic medication use (Supplemental Materials Tables S5–S8 and Figure S5).

### **Regions of interest**

The cortical ROIs were determined based on cortical parcellations from the DD Desai atlas (9): the dorsal anterior cingulate cortex (ACC) was defined as `ctx_G_and_S_cingul-Ant`, the rostral ACC as `ctx_G_and_S_cingul-Mid-Ant`, the insula as `G_insular_short`, `S_circular_insula_ant`, and `S_circular_insula_sup`. The subcortical ROIs were determined based on subcortical parcellations from the Talairach Daemon atlas: the caudate was defined as the Caudate Head, the putamen as the Putamen, and the nucleus accumbens as the Nucleus Accumbens (10).

FIGURE S1. Study timeline for the preschool depression study (PDS) including assessment and neuroimaging waves

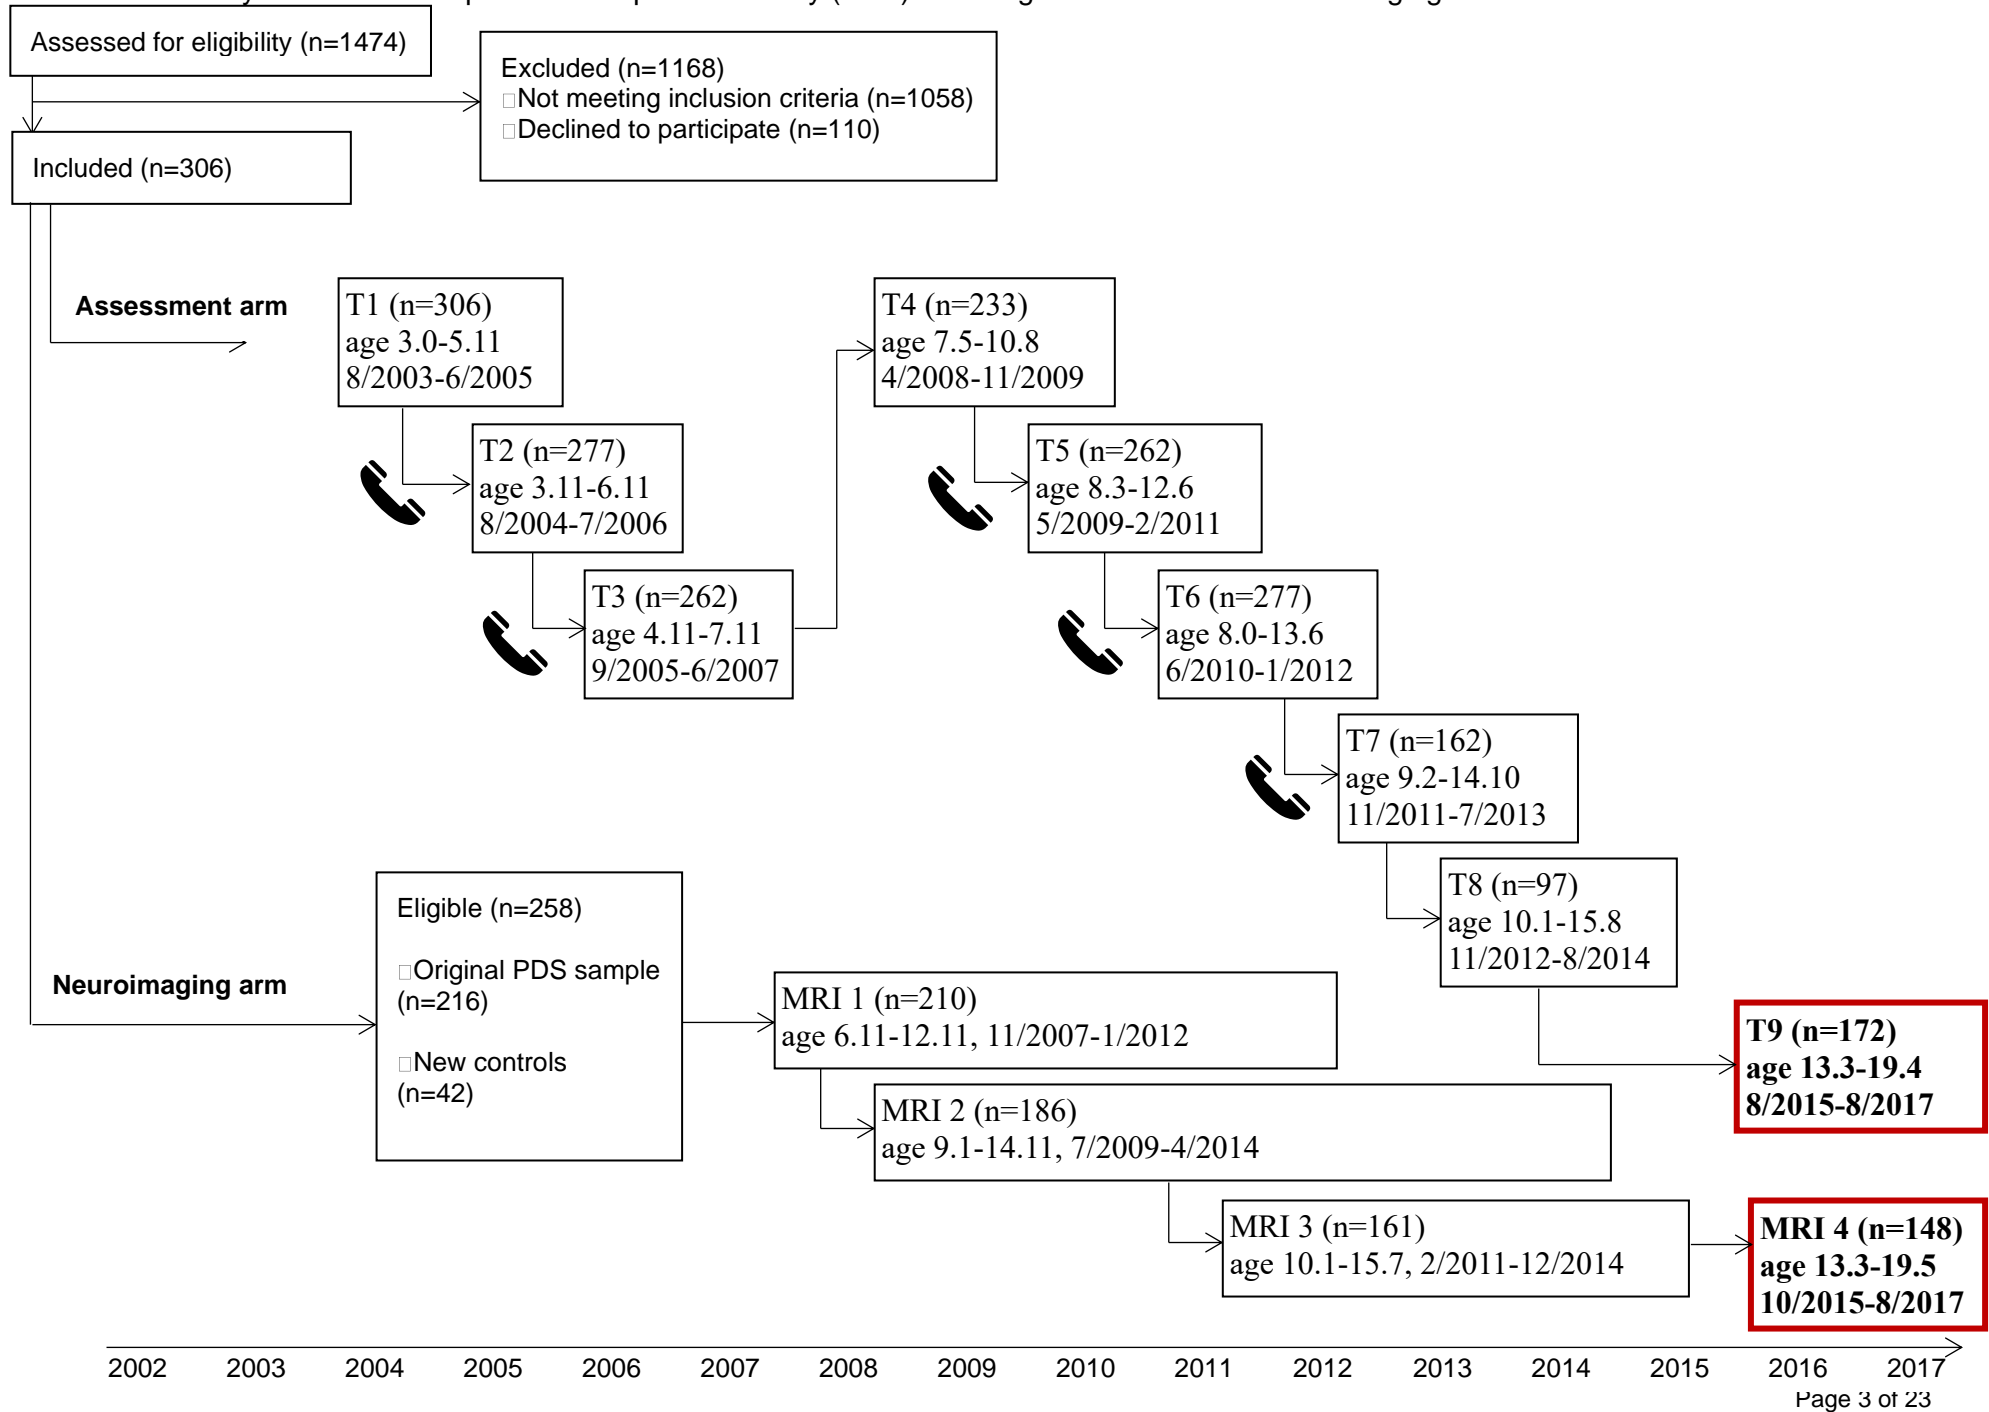

Phone icon indicates when semi-annual wave was conducted between formal annual behavioral assessments. In cases when subjects participated in an MRI but not a recent behavioral assessment, depression symptoms were assessed on the day of the MRI in the same manner as in the behavioral assessment (i.e., a semi-structured interview). As depicted, there were up to 14 possible assessment waves when depression symptoms were collected using semi-structured interviews (i.e. PAPA, CAPA, or KSADS). Reward task was collected at MRI 4 and current depression severity (CDI-2) at the concurrent Behavioral assessment T9.

## SUPPLEMENTAL RESULTS

Head motion (i.e. mean relative root mean square of realignment estimates) was significantly associated with average response to reward receipt in the rACC ( $p = 0.050$ ) and cumulative depression severity ( $p = 0.046$ ); however motion was not significantly associated with average response in all others ROIs for reward feedback and reward anticipation, and not significantly associated with current, preschool, school age, and adolescent depression severity.

FIGURE S2. Average group-level BOLD response to a) Win cue > Lose cue (reward anticipation) and b) Reward outcome > Loss outcome (reward receipt)

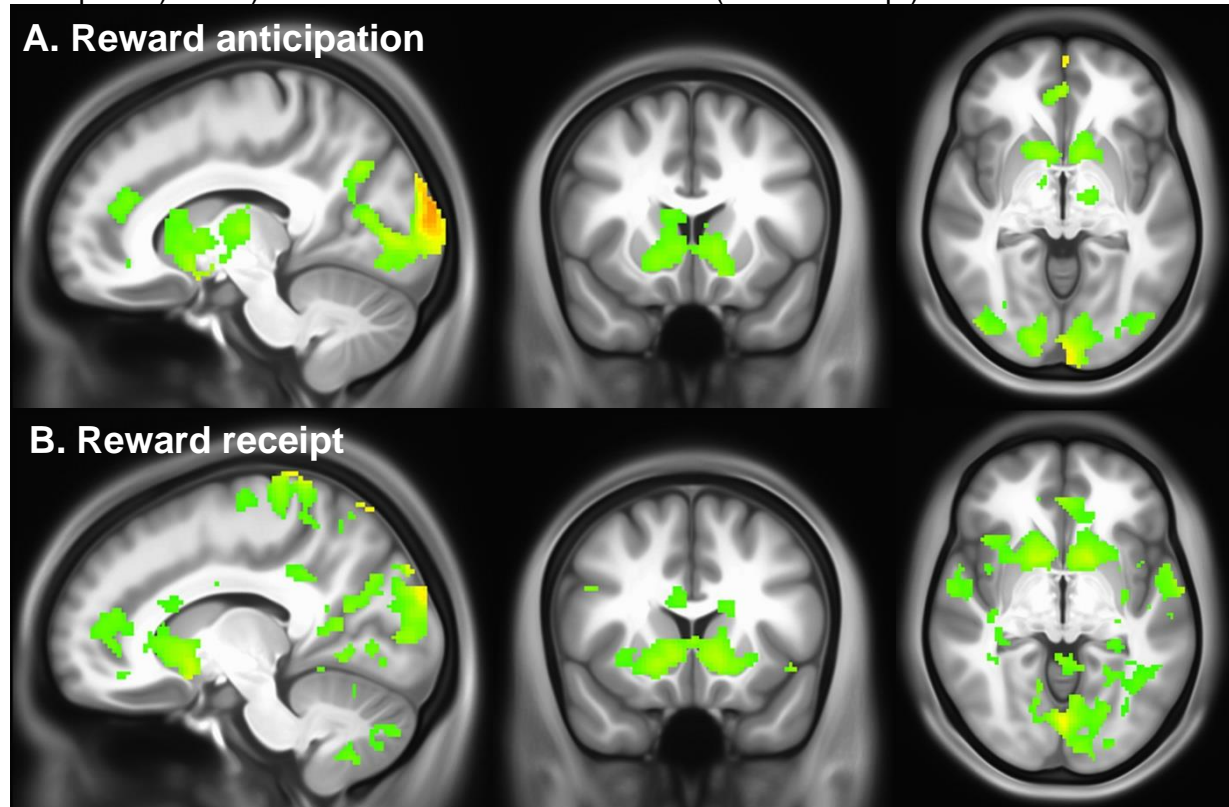

Blood-oxygen-level-dependent (BOLD) response overlaid on T1-weighted structural brain image. Images are centered at  $x=12$ ,  $y=14$ ,  $z=-4$  (MNI coordinates).

### Depression severity and neural response to reward receipt

See Table S1 for associations between cortico-striatal circuit and ROIs and depression severity. See Table S2 for whole brain associations between BOLD signal to reward receipt and current depression severity. Whole brain analyses did not reveal any significant clusters of activation during reward receipt that were correlated with cumulative depression severity.

### Associations between depression severity during distinct developmental periods and neural response to reward anticipation

Analyses of the subsample followed since preschool were mostly consistent with those of analyses of the full sample, with two exceptions: school age depression severity no longer predicted mean activity in the cortico-striatal circuit, caudate, or putamen (see Table S10). Analyses that included psychotropic medication as a covariate were consistent with those of analyses of the full sample, with two exceptions: school age depression severity no longer predicted mean activity in the caudate or putamen (see Table S7).

**Result for brain response to reward receipt**

TABLE S1. Current and cumulative depression severity predicting BOLD response to reward receipt in *a priori* ROIs in the full sample

|                   |         | Regions of Interest |               |               |               |               |               |               |
|-------------------|---------|---------------------|---------------|---------------|---------------|---------------|---------------|---------------|
|                   |         | Cortico-striatal    | NAcc          | Caudate       | Putamen       | Insula        | dACC          | rACC          |
| <i>Current</i>    | $\beta$ | -0.053              | -0.039        | -0.071        | 0.014         | -0.077        | -0.062        | -0.027        |
|                   | 95% CI  | -0.235, 0.130       | -0.219, 0.141 | -0.254, 0.112 | -0.167, 0.196 | -0.258, 0.104 | -0.248, 0.125 | -0.211, 0.156 |
|                   | $p$     | 0.568               | 0.877         | 0.877         | 0.877         | 0.877         | 0.877         | 0.877         |
| <i>Cumulative</i> | $\beta$ | -0.020              | -0.072        | -0.072        | 0.102         | -0.030        | -0.024        | 0.019         |
|                   | 95% CI  | -0.201, 0.160       | -0.249, 0.105 | -0.252, 0.108 | -0.078, 0.281 | -0.213, 0.154 | -0.208, 0.160 | -0.164, 0.201 |
|                   | $p$     | 0.823               | 0.841         | 0.841         | 0.841         | 0.841         | 0.841         | 0.841         |

$\beta$  represent standardized regression coefficient estimates;  $p$  values for individual ROIS (i.e. not cortico-striatal) are FDR corrected for multiple comparisons. Associations at  $p < .05$  bolded. Covariates of non-interest included in all models.

TABLE S2. Current depression severity associations with BOLD signal to reward receipt in whole brain analysis

| Brain region                        | Cluster Size<br>(# of 2mm <sup>3</sup> voxels) | MNI coordinates |     |     |
|-------------------------------------|------------------------------------------------|-----------------|-----|-----|
|                                     |                                                | x               | y   | z   |
| <b>Current depression severity</b>  |                                                |                 |     |     |
| Right precentral gyrus              | 105                                            | -48             | -16 | 60  |
| Left precuneus                      | 72                                             | -26             | -42 | 42  |
| Right superior frontal gyrus        | 66                                             | 26              | 58  | -2  |
| Left precentral gyrus               | 34                                             | -44             | -12 | 50  |
| Left precentral gyrus               | 30                                             | -38             | -22 | 52  |
| Left superior temporal gyrus        | 24                                             | -52             | -10 | 4   |
| Left middle temporal gyrus          | 23                                             | -52             | -70 | 12  |
| Right cingulate gyrus               | 23                                             | 26              | -36 | 42  |
| Left thalamus                       | 18                                             | -14             | -24 | 2   |
| Right middle temporal gyrus         | 14                                             | 50              | -66 | 6   |
| Left superior temporal gyrus/insula | 11                                             | -50             | -38 | 16  |
| Left uncus                          | 10                                             | -30             | -8  | -40 |
| Right parahippocampal gyrus         | 10                                             | 44              | -20 | -20 |
| Left postcentral gyrus              | 10                                             | -28             | -24 | 36  |

MNI coordinates correspond to peak activation within each cluster. Clusters significant at  $p < .005$  (uncorrected) and at least 10 voxels. c– clusters showing positive correlations with depression severity

**Results for brain response to reward anticipation**

TABLE S3. Separate analyses for current, cumulative, preschool, school age, and adolescent depression severity predicting BOLD response to reward anticipation in the full sample

|                   |         | Regions of Interest   |                       |                       |                       |                       |                       |                       |
|-------------------|---------|-----------------------|-----------------------|-----------------------|-----------------------|-----------------------|-----------------------|-----------------------|
|                   |         | Cortico-striatal      | NACC                  | Caudate               | Putamen               | Insula                | dACC                  | rACC                  |
| <i>Current</i>    | $\beta$ | -0.136                | <b>-0.296</b>         | -0.181                | -0.095                | -0.002                | 0.033                 | -0.043                |
|                   | 95% CI  | -0.312, 0.040         | <b>-0.470, -0.122</b> | -0.355, -0.007        | -0.270, 0.081         | -0.184, 0.180         | -0.148, 0.214         | -0.226, 0.140         |
|                   | p       | 0.129                 | <b>0.006</b>          | 0.126                 | 0.576                 | 0.984                 | 0.864                 | 0.864                 |
| <i>Cumulative</i> | $\beta$ | <b>-0.304</b>         | <b>-0.278</b>         | <b>-0.274</b>         | <b>-0.250</b>         | -0.180                | <b>-0.256</b>         | <b>-0.207</b>         |
|                   | 95% CI  | <b>-0.481, -0.128</b> | <b>-0.457, -0.100</b> | <b>-0.452, -0.097</b> | <b>-0.428, -0.071</b> | -0.361, 0.002         | <b>-0.434, -0.077</b> | <b>-0.388, -0.027</b> |
|                   | p       | <b>0.001</b>          | <b>0.008</b>          | <b>0.008</b>          | <b>0.010</b>          | 0.052                 | <b>0.010</b>          | <b>0.030</b>          |
| <i>Preschool</i>  | $\beta$ | <b>-0.178</b>         | -0.099                | <b>-0.138</b>         | <b>-0.187</b>         | <b>-0.129</b>         | <b>-0.160</b>         | <b>-0.154</b>         |
|                   | 95% CI  | <b>-0.297, -0.06</b>  | -0.221, 0.022         | <b>-0.257, -0.019</b> | <b>-0.306, -0.068</b> | <b>-0.251, -0.006</b> | <b>-0.281, -0.039</b> | <b>-0.276, -0.033</b> |
|                   | p       | <b>0.004</b>          | 0.107                 | <b>0.036</b>          | <b>0.015</b>          | <b>0.047</b>          | <b>0.026</b>          | <b>0.026</b>          |
| <i>School Age</i> | $\beta$ | <b>-0.172</b>         | -0.134                | <b>-0.168</b>         | <b>-0.168</b>         | -0.099                | -0.135                | -0.123                |
|                   | 95% CI  | <b>-0.306, -0.039</b> | -0.268, -0.001        | <b>-0.299, -0.036</b> | <b>-0.299, -0.037</b> | -0.236, 0.037         | -0.271, 0.000         | -0.259, 0.014         |
|                   | p       | <b>0.012</b>          | 0.074                 | <b>0.038</b>          | <b>0.038</b>          | 0.151                 | 0.074                 | 0.093                 |
| <i>Adolescent</i> | $\beta$ | <b>-0.151</b>         | <b>-0.185</b>         | -0.135                | -0.086                | -0.070                | -0.111                | -0.106                |
|                   | 95% CI  | <b>-0.274, -0.029</b> | <b>-0.307, -0.064</b> | -0.258, -0.012        | -0.210, 0.038         | -0.195, 0.055         | -0.234, 0.013         | -0.23, 0.018          |
|                   | p       | <b>0.016</b>          | <b>0.019</b>          | 0.094                 | 0.208                 | 0.270                 | 0.139                 | 0.139                 |

$\beta$  represent standardized regression coefficient estimates;  $p$  values for individual ROIs (i.e. not cortico-striatal) are FDR corrected for multiple comparisons. Associations at  $p < .05$  bolded. Covariates of non-interest included in all models.

TABLE S4. Preschool, school age, and adolescent depression severity simultaneously (i.e., in same model) predicting BOLD response to reward anticipation in the subsample followed since preschool

| <b>Regions of Interest</b>  | <b>Developmental period</b> | <b><math>\beta</math></b> | <b>95% CI</b>         | <b><math>p</math></b> |
|-----------------------------|-----------------------------|---------------------------|-----------------------|-----------------------|
| Cortico-striatal<br>Circuit | <b>Preschool</b>            | <b>-0.156</b>             | <b>-0.3, -0.012</b>   | <b>0.034</b>          |
|                             | School Age                  | -0.003                    | -0.174, 0.168         | 0.972                 |
|                             | Adolescence                 | -0.104                    | -0.239, 0.031         | 0.129                 |
| Nucleus<br>accumbens        | Preschool                   | -0.064                    | -0.21, 0.081          | 0.381                 |
|                             | School Age                  | -0.008                    | -0.181, 0.165         | 0.928                 |
|                             | <b>Adolescence</b>          | <b>-0.154</b>             | <b>-0.29, -0.018</b>  | <b>0.027</b>          |
| Caudate                     | Preschool                   | -0.105                    | -0.25, 0.041          | 0.156                 |
|                             | School Age                  | -0.035                    | -0.208, 0.138         | 0.687                 |
|                             | Adolescence                 | -0.078                    | -0.215, 0.058         | 0.256                 |
| Putamen                     | <b>Preschool</b>            | <b>-0.176</b>             | <b>-0.322, -0.029</b> | <b>0.019</b>          |
|                             | School Age                  | -0.011                    | -0.186, 0.164         | 0.901                 |
|                             | Adolescence                 | -0.028                    | -0.166, 0.109         | 0.683                 |
| Insula                      | Preschool                   | -0.128                    | -0.278, 0.022         | 0.093                 |
|                             | School Age                  | 0.014                     | -0.165, 0.193         | 0.876                 |
|                             | Adolescence                 | -0.036                    | -0.176, 0.105         | 0.616                 |
| Dorsal<br>ACC               | Preschool                   | -0.140                    | -0.288, 0.008         | 0.064                 |
|                             | School Age                  | -0.013                    | -0.189, 0.163         | 0.883                 |
|                             | Adolescence                 | -0.068                    | -0.206, 0.071         | 0.335                 |
| Rostral<br>ACC              | <b>Preschool</b>            | <b>-0.156</b>             | <b>-0.304, -0.008</b> | <b>0.040</b>          |
|                             | School Age                  | 0.042                     | -0.135, 0.218         | 0.642                 |
|                             | Adolescence                 | -0.094                    | -0.233, 0.044         | 0.180                 |

Associations at  $p < .05$  bolded. Covariates of non-interest included in all models.



FIGURE S3. Region of interest masks for subcortical and cortical areas

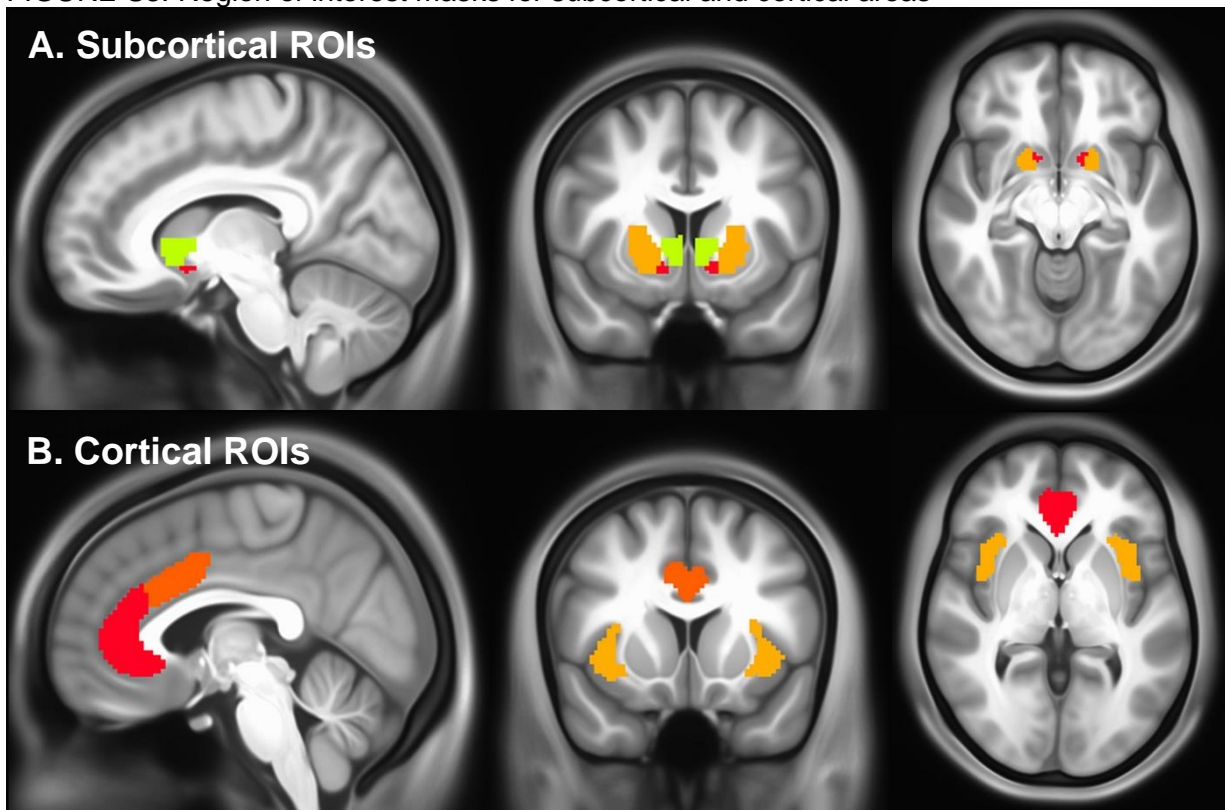

Images in panel A are centered at  $x = -10$ ,  $y = -10$ ,  $z = -10$ , and images in panel B are centered at  $x = -4$ ,  $y = -13$ ,  $z = 1$  (radiological coordinates). Panel A: yellow-green—caudate, pink—nucleus accumbens, gold—putamen. Panel B: pink—rostral ACC, orange—dorsal ACC; gold—insula

FIGURE S4. BOLD response to reward anticipation in striatum associated with cumulative depression severity in the full sample from whole brain analysis (clusters not depicted in Figure 2;  $p < .005$ , uncorrected).

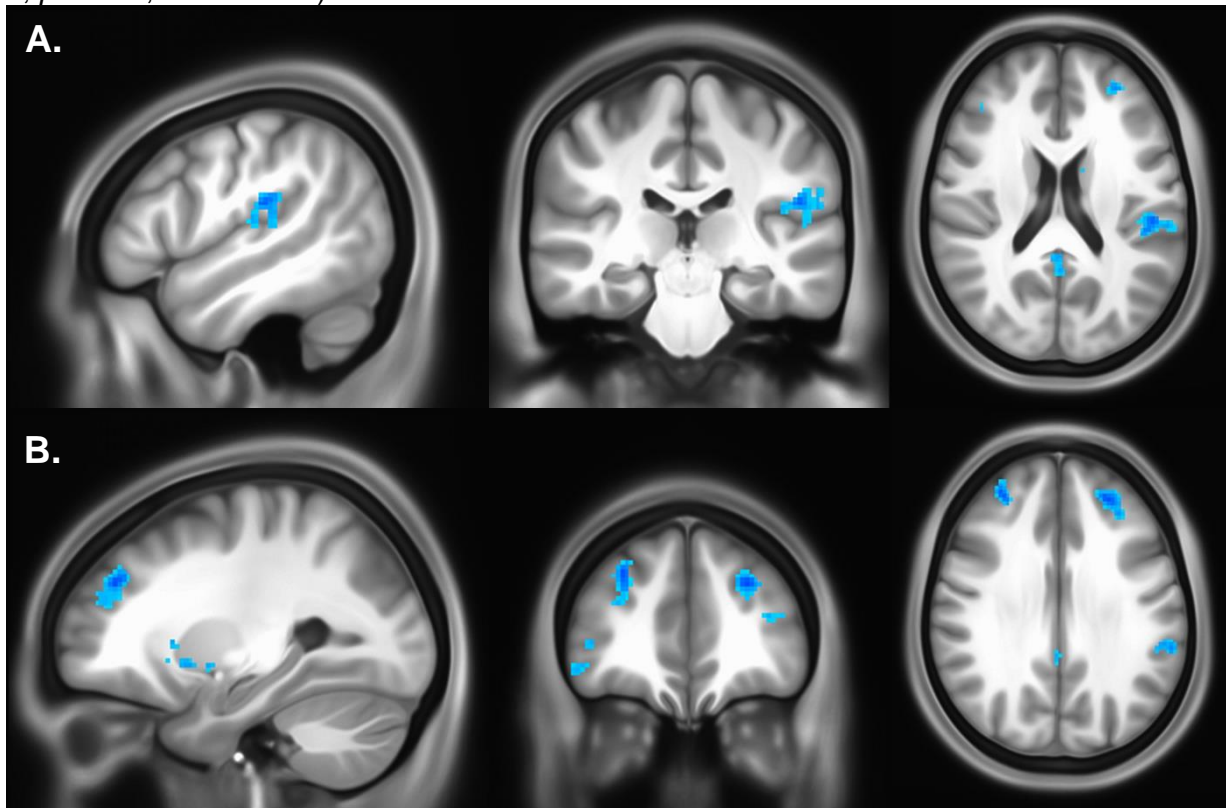

Images in panel a are centered at  $x = -50$ ,  $y = -26$ ,  $z = 20$ , and images in panel b are centered at  $x = -26$ ,  $y = 42$ ,  $z = 30$  (MNI coordinates).

**Results with Psychotropic medication included as a covariate**

TABLE S5. Current and cumulative depression severity simultaneously (i.e., in same model) predicting BOLD response to reward anticipation in *a priori* ROIs in the full sample with psychotropic medication use included as a covariate

| <b>Regions of Interest</b> | <b>Depression severity</b> | <b><math>\beta</math></b> | <b>95% CI</b>         | <b><math>p</math></b> |
|----------------------------|----------------------------|---------------------------|-----------------------|-----------------------|
| Cortico-Striatal Circuit   | Current                    | 0.027                     | -0.184, 0.238         | 0.800                 |
|                            | <b>Cumulative</b>          | <b>-0.299</b>             | <b>-0.508, -0.089</b> | <b>0.006</b>          |
| Nucleus accumbens          | <b>Current</b>             | <b>-0.225</b>             | <b>-0.439, -0.011</b> | <b>0.039</b>          |
|                            | Cumulative                 | -0.15                     | -0.363, 0.062         | 0.164                 |
| Caudate                    | Current                    | -0.065                    | -0.277, 0.147         | 0.547                 |
|                            | <b>Cumulative</b>          | <b>-0.222</b>             | <b>-0.433, -0.011</b> | <b>0.039</b>          |
| Putamen                    | Current                    | 0.044                     | -0.169, 0.256         | 0.686                 |
|                            | <b>Cumulative</b>          | <b>-0.245</b>             | <b>-0.457, -0.034</b> | <b>0.024</b>          |
| Insula                     | Current                    | 0.108                     | -0.114, 0.329         | 0.337                 |
|                            | <b>Cumulative</b>          | <b>-0.24</b>              | <b>-0.46, -0.020</b>  | <b>0.032</b>          |
| Dorsal ACC                 | <b>Current</b>             | <b>0.220</b>              | <b>0.007, 0.434</b>   | <b>0.043</b>          |
|                            | <b>Cumulative</b>          | <b>-0.382</b>             | <b>-0.594, -0.170</b> | <b>0.001</b>          |
| Rostral ACC                | Current                    | 0.126                     | -0.095, 0.347         | 0.261                 |
|                            | <b>Cumulative</b>          | <b>-0.221</b>             | <b>-0.441, -0.002</b> | <b>0.048</b>          |

Associations at  $p < .05$  bolded. Covariates of non-interest included in all models.

TABLE S6. Preschool, school age, and adolescent depression severity simultaneously (i.e., in same model) predicting BOLD response to reward anticipation in *a priori* ROIs in the subsample followed since preschool with psychotropic medication use included as a covariate

| <b>Regions of Interest</b> | <b>Developmental period</b> | <b><math>\beta</math></b> | <b>95% CI</b>         | <b><math>p</math></b> |
|----------------------------|-----------------------------|---------------------------|-----------------------|-----------------------|
| Cortico-striatal Circuit   | <b>Preschool</b>            | <b>-0.156</b>             | <b>-0.301, -0.011</b> | <b>0.035</b>          |
|                            | School Age                  | -0.002                    | -0.176, 0.173         | 0.985                 |
|                            | Adolescence                 | -0.101                    | -0.249, 0.047         | 0.177                 |
| Nucleus accumbens          | Preschool                   | -0.065                    | -0.211, 0.082         | 0.383                 |
|                            | School Age                  | -0.007                    | -0.183, 0.170         | 0.940                 |
|                            | <b>Adolescence</b>          | <b>-0.152</b>             | <b>-0.301, -0.002</b> | <b>0.047</b>          |
| Caudate                    | Preschool                   | -0.105                    | -0.251, 0.041         | 0.157                 |
|                            | School Age                  | -0.031                    | -0.207, 0.145         | 0.729                 |
|                            | Adolescence                 | -0.069                    | -0.219, 0.080         | 0.358                 |
| Putamen                    | <b>Preschool</b>            | <b>-0.176</b>             | <b>-0.323, -0.029</b> | <b>0.020</b>          |
|                            | School Age                  | -0.008                    | -0.186, 0.170         | 0.933                 |
|                            | Adolescence                 | -0.021                    | -0.172, 0.129         | 0.779                 |
| Insula                     | Preschool                   | -0.128                    | -0.278, 0.023         | 0.096                 |
|                            | School Age                  | 0.005                     | -0.177, 0.187         | 0.955                 |
|                            | Adolescence                 | -0.054                    | -0.208, 0.100         | 0.488                 |
| Dorsal ACC                 | Preschool                   | -0.139                    | -0.287, 0.009         | 0.066                 |
|                            | School Age                  | -0.026                    | -0.205, 0.153         | 0.775                 |
|                            | Adolescence                 | -0.094                    | -0.245, 0.057         | 0.220                 |
| Rostral ACC                | <b>Preschool</b>            | <b>-0.157</b>             | <b>-0.305, -0.009</b> | <b>0.038</b>          |
|                            | School Age                  | 0.059                     | -0.120, 0.237         | 0.514                 |
|                            | Adolescence                 | -0.058                    | -0.209, 0.093         | 0.444                 |

Associations at  $p < .05$  bolded. Covariates of non-interest included in all models.

TABLE S7. Independent regressions with current, cumulative, preschool, school age, and adolescent depression severity predicting BOLD response to reward anticipation in *a priori* ROIs in the full sample with psychotropic medication use included as a covariate

|                   |         | Regions of Interest   |                       |                       |                       |                       |                       |                      |
|-------------------|---------|-----------------------|-----------------------|-----------------------|-----------------------|-----------------------|-----------------------|----------------------|
|                   |         | Cortico-striatal      | NACC                  | Caudate               | Putamen               | Insula                | dACC                  | rACC                 |
| <i>Current</i>    | $\beta$ | -0.100                | <b>-0.289</b>         | -0.159                | -0.061                | 0.005                 | 0.058                 | 0.032                |
|                   | 95% CI  | -0.297, 0.096         | <b>-0.484, -0.094</b> | -0.354, 0.036         | -0.257, 0.136         | -0.198, 0.209         | -0.145, 0.261         | -0.171, 0.235        |
|                   | p       | 0.315                 | <b>0.024</b>          | 0.325                 | 0.860                 | 0.958                 | 0.860                 | 0.907                |
| <i>Cumulative</i> | $\beta$ | <b>-0.321</b>         | <b>-0.277</b>         | <b>-0.287</b>         | <b>-0.265</b>         | <b>-0.223</b>         | <b>-0.307</b>         | -0.180               |
|                   | 95% CI  | <b>-0.518, -0.125</b> | <b>-0.476, -0.078</b> | <b>-0.484, -0.089</b> | <b>-0.463, -0.067</b> | <b>-0.424, -0.022</b> | <b>-0.504, -0.110</b> | -0.381, 0.021        |
|                   | p       | <b>0.002</b>          | <b>0.013</b>          | <b>0.013</b>          | <b>0.014</b>          | <b>0.036</b>          | <b>0.013</b>          | 0.079                |
| <i>Preschool</i>  | $\beta$ | <b>-0.170</b>         | -0.088                | <b>-0.128</b>         | <b>-0.182</b>         | <b>-0.132</b>         | <b>-0.163</b>         | <b>-0.138</b>        |
|                   | 95% CI  | <b>-0.291, -0.050</b> | -0.211, 0.035         | <b>-0.250, -0.007</b> | <b>-0.304, -0.061</b> | <b>-0.257, -0.008</b> | <b>-0.286, -0.040</b> | <b>-0.26, -0.015</b> |
|                   | p       | <b>0.006</b>          | 0.161                 | <b>0.046</b>          | <b>0.022</b>          | <b>0.046</b>          | <b>0.030</b>          | <b>0.046</b>         |
| <i>School Age</i> | $\beta$ | <b>-0.165</b>         | -0.121                | -0.160                | -0.164                | -0.109                | -0.147                | -0.100               |
|                   | 95% CI  | <b>-0.306, -0.025</b> | -0.261, 0.019         | -0.299, -0.022        | -0.302, -0.026        | -0.253, 0.034         | -0.289, -0.005        | -0.243, 0.043        |
|                   | p       | <b>0.022</b>          | 0.136                 | 0.070                 | 0.070                 | 0.160                 | 0.086                 | 0.169                |
| <i>Adolescent</i> | $\beta$ | <b>-0.152</b>         | <b>-0.186</b>         | -0.134                | -0.078                | -0.090                | -0.134                | -0.079               |
|                   | 95% CI  | <b>-0.290, -0.014</b> | <b>-0.323, -0.049</b> | -0.272, 0.005         | -0.217, 0.062         | -0.23, 0.051          | -0.273, 0.005         | -0.218, 0.06         |
|                   | p       | <b>0.032</b>          | <b>0.050</b>          | 0.116                 | 0.273                 | 0.273                 | 0.116                 | 0.273                |

$\beta$  represent standardized regression coefficient estimates;  $p$  values for individual ROIs (i.e. not cortico-striatal) are FDR corrected for multiple comparisons. Associations at  $p < .05$  bolded. Covariates of non-interest included in all models.

TABLE S8. Current and cumulative depression severity associations in a whole brain analysis with BOLD response to reward anticipation with psychotropic medication use included as a covariate

| Brain region                                        | Cluster Size<br>(# of 2mm <sup>3</sup> voxels) | MNI coordinates |      |     |
|-----------------------------------------------------|------------------------------------------------|-----------------|------|-----|
|                                                     |                                                | x               | y    | z   |
| <b>Current depression severity<sup>b</sup></b>      |                                                |                 |      |     |
| Right cerebellum <sup>c</sup>                       | 45                                             | 26              | -84  | -44 |
| Left medial frontal gyrus <sup>c</sup>              | 33                                             | -18             | -6   | 58  |
| Left inferior temporal gyrus <sup>c</sup>           | 27                                             | 62              | -32  | -20 |
| Right cerebellum <sup>c</sup>                       | 26                                             | 54              | -70  | -32 |
| Right nucleus accumbens                             | 24                                             | 14              | 14   | -4  |
| Left superior temporal gyrus <sup>c</sup>           | 18                                             | -48             | 14   | -16 |
| Left middle occipital gyrus <sup>c</sup>            | 16                                             | -16             | -104 | 16  |
| Left medial globus pallidus                         | 16                                             | -18             | 2    | -8  |
| Right parietal lobule                               | 16                                             | 32              | -50  | 58  |
| Left nucleus accumbens                              | 15                                             | -12             | 12   | -8  |
| Left medial frontal gyrus <sup>c</sup>              | 14                                             | -12             | 28   | -12 |
| Left superior frontal gyrus <sup>c</sup>            | 13                                             | -32             | 34   | 38  |
| Left pons                                           | 13                                             | -8              | -20  | -44 |
| Right parahippocampal gyrus <sup>c</sup>            | 11                                             | 32              | -14  | -26 |
| Left culmen <sup>c</sup>                            | 10                                             | -10             | -32  | -16 |
| <b>Cumulative depression severity<sup>a</sup></b>   |                                                |                 |      |     |
| Right anterior cingulate <sup>e</sup>               | 680                                            | 4               | 12   | 28  |
| Left inferior parietal lobule (insula) <sup>e</sup> | 608                                            | -54             | -28  | 28  |
| Left nucleus accumbens <sup>e</sup>                 | 520                                            | -8              | 6    | -14 |
| Left posterior cingulate <sup>e</sup>               | 505                                            | -2              | -44  | 12  |
| Right postcentral gyrus                             | 273                                            | 46              | -40  | 60  |
| Right postcentral gyrus                             | 268                                            | 62              | -20  | 38  |
| Right cuneus                                        | 236                                            | 18              | -76  | 12  |
| Left cerebellum                                     | 226                                            | -20             | -40  | -40 |
| Left postcentral gyrus                              | 207                                            | -12             | -54  | 72  |
| Left postcentral gyrus                              | 189                                            | -42             | -42  | 64  |
| Right caudate                                       | 187                                            | 16              | 20   | -4  |
| Left inferior frontal gyrus                         | 164                                            | -54             | 12   | 14  |

MNI coordinates correspond to peak activation within each cluster. a– cumulative depression severity cluster significant at  $p < .005$  (uncorrected) and at least 150 voxels; b– current depression severity clusters significant at  $p < .005$  (uncorrected) and at least 10 voxels. c– clusters showing positive correlations with depression severity; e- clusters significant at corrected  $p < .05$

FIGURE S5. BOLD response to reward anticipation in striatum associated with cumulative depression severity and current depression severity with psychotropic medication use included as a covariate in whole brain analysis ( $p < .005$ , uncorrected).

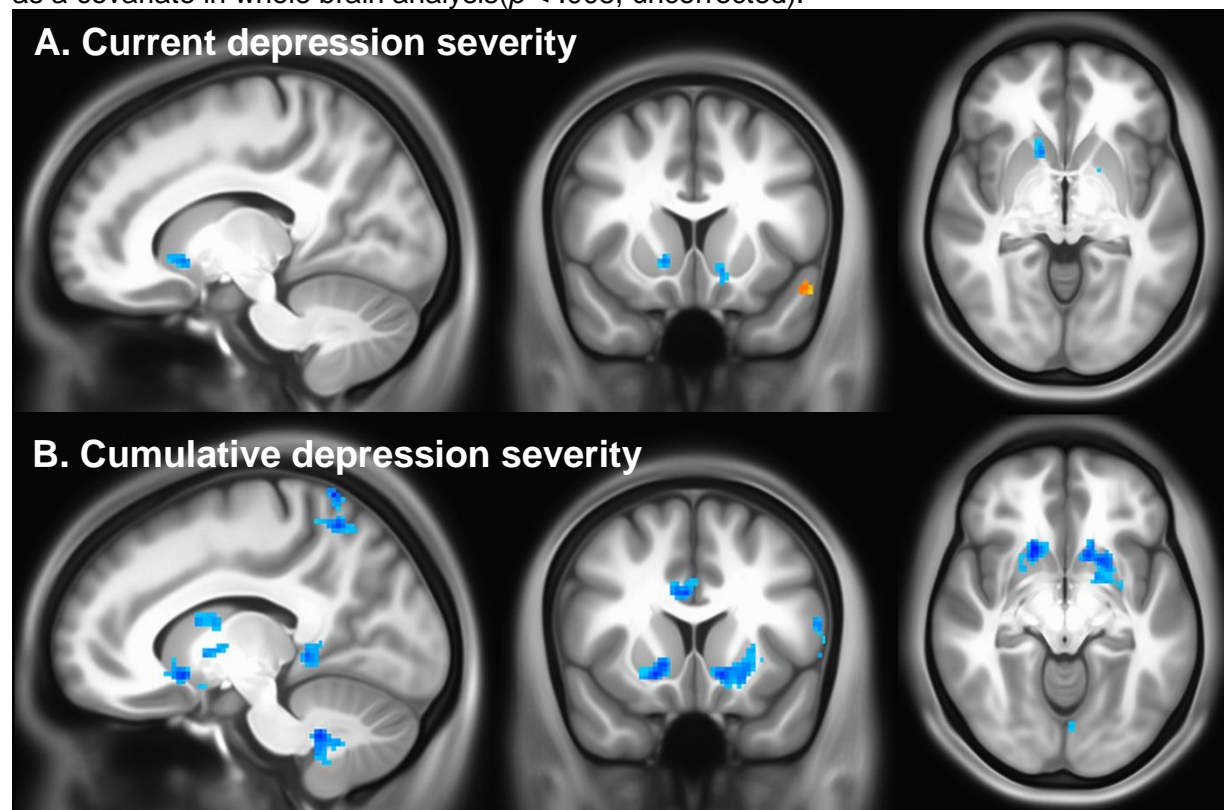

Images in panel A are centered at  $x=14, y=14, z=-4$ , and images in panel B are centered at  $x=-12, y=14, z=-8$  (MNI coordinates).

### Results in the subsample followed since preschool

TABLE S9. Current and cumulative depression severity simultaneously (i.e., in same model) predicting BOLD response to reward anticipation in *a priori* ROIs in the subsample followed since preschool

| Regions of Interest      | Depression severity | $\beta$       | 95% CI                | <i>p</i>     |
|--------------------------|---------------------|---------------|-----------------------|--------------|
| Cortico-Striatal Circuit | Current             | 0.060         | -0.147, 0.266         | 0.566        |
|                          | <b>Cumulative</b>   | <b>-0.340</b> | <b>-0.559, -0.121</b> | <b>0.003</b> |
| Nucleus accumbens        | <b>Current</b>      | <b>-0.223</b> | <b>-0.433, -0.013</b> | <b>0.038</b> |
|                          | Cumulative          | -0.137        | -0.360, 0.086         | 0.225        |
| Caudate                  | Current             | -0.03         | -0.237, 0.177         | 0.775        |
|                          | <b>Cumulative</b>   | <b>-0.239</b> | <b>-0.459, -0.019</b> | <b>0.033</b> |
| Putamen                  | Current             | 0.092         | -0.118, 0.302         | 0.385        |
|                          | <b>Cumulative</b>   | <b>-0.298</b> | <b>-0.521, -0.075</b> | <b>0.009</b> |
| Insula                   | Current             | 0.136         | -0.084, 0.357         | 0.224        |
|                          | <b>Cumulative</b>   | <b>-0.246</b> | <b>-0.480, -0.012</b> | <b>0.039</b> |
| Dorsal ACC               | <b>Current</b>      | <b>0.259</b>  | <b>0.047, 0.472</b>   | <b>0.017</b> |
|                          | <b>Cumulative</b>   | <b>-0.407</b> | <b>-0.632, -0.182</b> | <b>0.001</b> |
| Rostral ACC              | Current             | 0.126         | -0.093, 0.346         | 0.256        |
|                          | <b>Cumulative</b>   | <b>-0.318</b> | <b>-0.55, -0.085</b>  | <b>0.008</b> |

Associations at  $p < .05$  bolded. Covariates of non-interest included in all models.



TABLE S10. Independent regressions with cumulative, current, preschool, school age, and adolescent depression severity predicting BOLD response to reward anticipation in *a priori* ROIs in the subsample followed since preschool

|                   |          | Regions of Interest   |                       |                       |                       |               |                      |                       |
|-------------------|----------|-----------------------|-----------------------|-----------------------|-----------------------|---------------|----------------------|-----------------------|
|                   |          | Cortico-striatal      | NAcc                  | Caudate               | Putamen               | Insula        | dACC                 | rACC                  |
| <i>Current</i>    | $\beta$  | -0.099                | <b>-0.287</b>         | -0.141                | -0.047                | 0.021         | 0.069                | -0.022                |
|                   | 95% CI   | -0.285, 0.088         | <b>-0.470, -0.104</b> | -0.325, 0.042         | -0.234, 0.141         | -0.174, 0.216 | -0.125, 0.264        | -0.218, 0.174         |
|                   | <i>p</i> | 0.297                 | <b>0.015</b>          | 0.386                 | 0.828                 | 0.828         | 0.828                | 0.828                 |
| <i>Cumulative</i> | $\beta$  | <b>-0.318</b>         | <b>-0.265</b>         | <b>-0.268</b>         | <b>-0.264</b>         | -0.184        | <b>-0.273</b>        | <b>-0.249</b>         |
|                   | 95% CI   | <b>-0.516, -0.120</b> | <b>-0.465, -0.065</b> | <b>-0.467, -0.069</b> | <b>-0.468, -0.061</b> | -0.391, 0.022 | <b>-0.477, -0.07</b> | <b>-0.454, -0.044</b> |
|                   | <i>p</i> | <b>0.002</b>          | <b>0.017</b>          | <b>0.017</b>          | <b>0.017</b>          | 0.080         | <b>0.017</b>         | <b>0.021</b>          |
| <i>School Age</i> | $\beta$  | -0.140                | -0.101                | -0.130                | -0.137                | -0.083        | -0.128               | -0.092                |
|                   | 95% CI   | -0.281, 0.000         | -0.243, 0.040         | -0.270, 0.009         | -0.279, 0.006         | -0.227, 0.062 | -0.271, 0.015        | -0.237, 0.052         |
|                   | <i>p</i> | 0.051                 | 0.238                 | 0.159                 | 0.159                 | 0.259         | 0.159                | 0.248                 |
| <i>Adolescent</i> | $\beta$  | <b>-0.142</b>         | -0.172                | -0.113                | -0.073                | -0.062        | -0.105               | -0.120                |
|                   | 95% CI   | <b>-0.273, -0.011</b> | -0.301, -0.043        | -0.244, 0.017         | -0.208, 0.061         | -0.197, 0.073 | -0.238, 0.029        | -0.253, 0.014         |
|                   | <i>p</i> | <b>0.034</b>          | 0.057                 | 0.177                 | 0.340                 | 0.363         | 0.187                | 0.177                 |

$\beta$  represent standardized regression coefficient estimates; *p* values for individual ROIs (i.e. not cortico-striatal) are FDR corrected for multiple comparisons. Associations at *p* < .05 bolded. Covariates of non-interest included in all models. Preschool developmental period not included because model only included participants that had been followed since preschool, and therefore results are identical to those in Table S3.

TABLE S11. Current and cumulative depression severity associations in a whole brain analysis with BOLD response to reward anticipation in the subsample followed since preschool using mask of clusters from full sample

| Brain region                                      | Cluster Size<br>(# of 2mm <sup>3</sup> voxels) | MNI coordinates |      |     |
|---------------------------------------------------|------------------------------------------------|-----------------|------|-----|
|                                                   |                                                | x               | y    | z   |
| <b>Current depression severity<sup>b</sup></b>    |                                                |                 |      |     |
| Left cuneus <sup>c,d</sup>                        | 35                                             | -14             | -102 | 16  |
| Left middle frontal gyrus <sup>c,d</sup>          | 28                                             | -16             | -0   | 62  |
| Right nucleus accumbens <sup>d</sup>              | 20                                             | 10              | 10   | -4  |
| Right inferior temporal gyrus <sup>c</sup>        | 17                                             | 62              | -32  | -22 |
| Left nucleus accumbens <sup>d</sup>               | 17                                             | -12             | 14   | -8  |
| Left medial frontal gyrus <sup>c</sup>            | 13                                             | -18             | -8   | 58  |
| Left pons                                         | 11                                             | -8              | -20  | -46 |
| <b>Cumulative depression severity<sup>a</sup></b> |                                                |                 |      |     |
| Left inferior parietal lobule/insula              | 210                                            | -56             | -36  | 32  |
| Left nucleus accumbens                            | 163                                            | -12             | 14   | -10 |
| Right lingual gyrus                               | 148                                            | 6               | -72  | -2  |
| Right putamen                                     | 146                                            | 18              | 20   | -6  |
| Right middle frontal gyrus                        | 142                                            | 50              | 40   | -4  |
| Left superior frontal gyrus                       | 124                                            | -28             | 42   | 30  |
| Right middle frontal gyrus                        | 106                                            | 24              | 56   | 24  |
| Left caudate                                      | 59                                             | -10             | 6    | 16  |

MNI coordinates correspond to peak activation within each cluster. a– cumulative depression severity cluster significant at  $p < .005$  (uncorrected) and at least 50 voxels; b– current depression severity clusters significant at  $p < .01$  (uncorrected) and at least 10 voxels. c– clusters showing positive correlations with depression severity. d– current depression severity clusters significant at  $p < .005$  (uncorrected) and at least 10 voxels.

FIGURE S6. BOLD response to reward anticipation in striatum associated with cumulative depression severity and current depression severity in the subsample followed since preschool ( $p < .005$ , uncorrected).

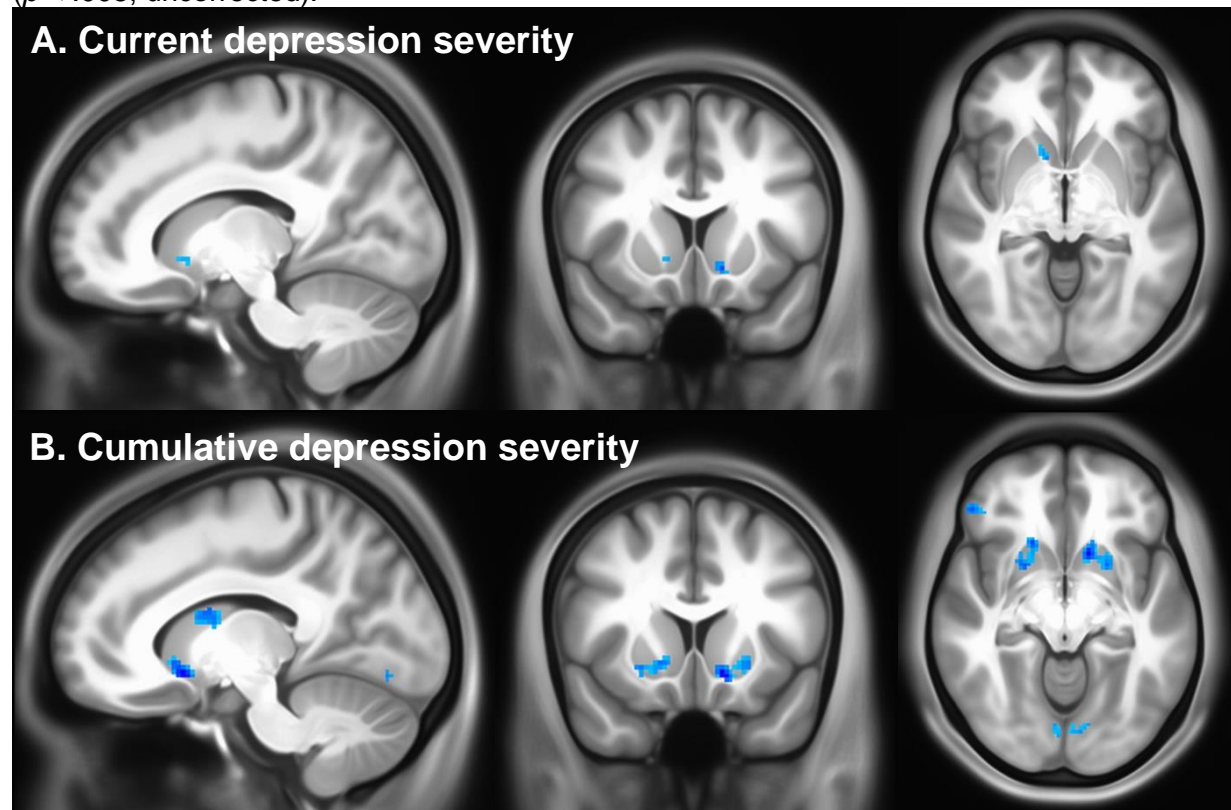

Images in panel A are centered at  $x=14, y=14, z=-4$ , and images in panel B are centered at  $x=-12, y=14, z=-8$  (MNI coordinates).

**Whole brain analyses using equitable thresholding and clustering (ETAC) (11)**

FIGURE S7. BOLD response to reward anticipation in striatum associated with cumulative depression severity and current depression severity from ETAC analyses

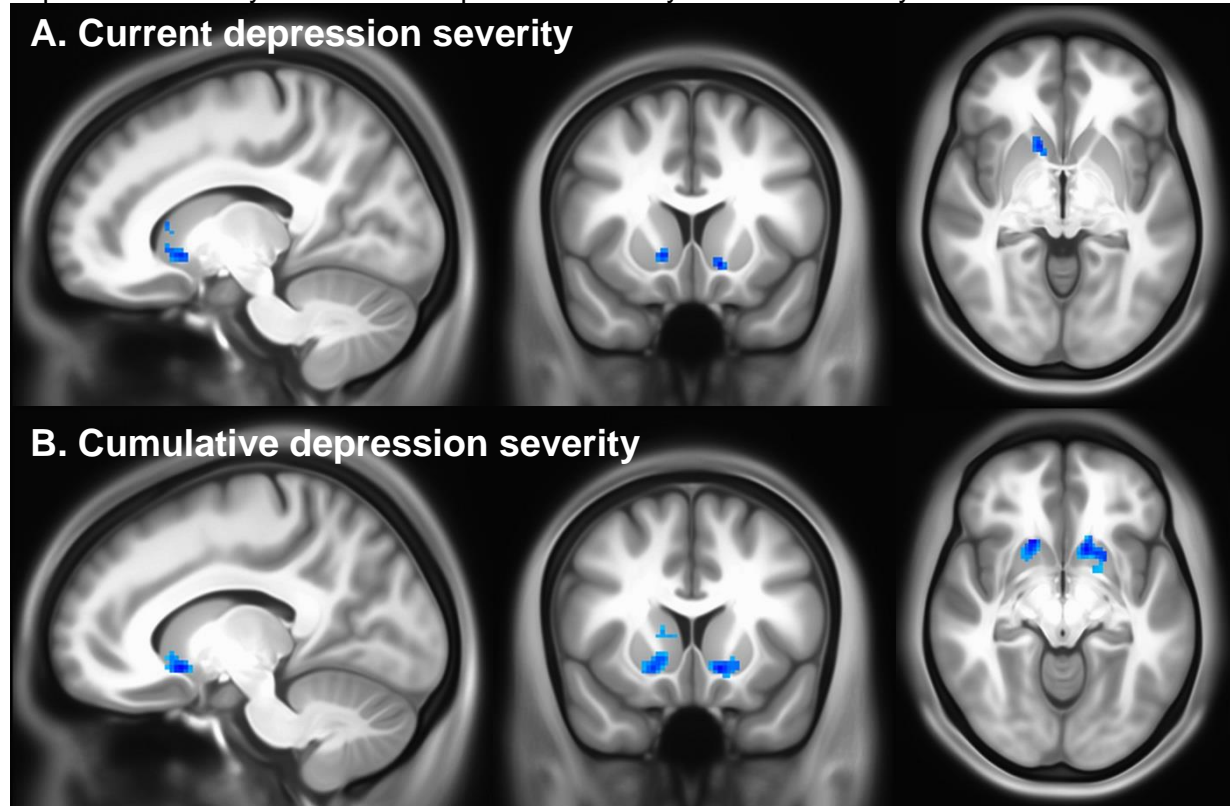

TABLE S12. Current and cumulative depression severity associations in a whole brain analysis with BOLD response to reward anticipation from ETAC analyses

| Brain region                                       | Cluster Size<br>(# of 2mm <sup>3</sup> voxels) | MNI coordinates |      |    |
|----------------------------------------------------|------------------------------------------------|-----------------|------|----|
|                                                    |                                                | x               | y    | z  |
| <b>Current depression severity <sup>a</sup></b>    |                                                |                 |      |    |
| Right ventral striatum                             | 35                                             | 14              | 14   | -4 |
| Left cuneus <sup>c</sup>                           | 25                                             | -14             | -100 | 16 |
| Left ventral striatum                              | 19                                             | -12             | 12   | -8 |
| <b>Cumulative depression severity <sup>b</sup></b> |                                                |                 |      |    |
| Left ventral striatum                              | 153                                            | -12             | 14   | -8 |
| Right putamen                                      | 102                                            | 18              | 18   | -8 |
| Cingulate gyrus                                    | 58                                             | 0               | -42  | 26 |
| Right caudate                                      | 27                                             | 10              | 16   | 6  |
| Right putamen                                      | 25                                             | 22              | 0    | 14 |
| Left caudate                                       | 24                                             | -2              | 12   | 0  |

MNI coordinates correspond to peak activation within each cluster. a– current depression severity clusters significant at  $p < .005$  and at least 10 voxels; b– cumulative depression severity cluster significant at  $p < .005$  and at least 20 voxels; c– clusters showing positive correlations with depression severity. All cluster significant using equitable thresholding and clustering method (ETAC).

## MANCOVA ANALYSES

### Cue type x Current and Cumulative depression severity interactions

#### Cue Type x Current and Cumulative depression severity

To test for differential associations between depression severity and BOLD to the four different cue types (Win, Lose, Mixed, Neutral), a MANCOVA was conducted that included both cumulative and current depression severity, as well as other covariates of non-interest (age, sex, race, SES). This MANCOVA revealed a significant Cue Type x Cumulative depression interaction for the cortico-striatal circuit ( $F(3,119) = 3.06, p = 0.031$ ), and then in follow-up analyses the putamen ( $F(3, 119) = 2.78, p = 0.044$ ), and dorsal ACC ( $F(3, 119) = 4.61, p = 0.004$ ). The MANCOVA's for caudate and rostral ACC were trend level ( $F(3,119) = 2.08, p = 0.107$ ;  $F(3,119) = 2.31, p = 0.080$ , respectively). The same MANCOVA revealed no significant Cue Type x Current depression interactions for the ROIs, though this interaction for the nucleus accumbens was approaching significance ( $F(3, 119) = 2.56, p = 0.059$ ). Thus, these MANCOVA results are highly consistent with the multiple regression results for the cortical-striatal circuit, the putamen, the dorsal ACC and to some extent the nucleus accumbens, with partial support for the caudate and rACC.

#### Cue Type x Cumulative depression severity

Another MANCOVA only including cumulative depression and covariates of non-interest revealed a significant Cue Type x Cumulative depression interaction for the cortico-striatal circuit ( $F(3,122) = 3.90, p = 0.011$ ) as a whole, and in follow-up analyses, the caudate ( $F(3,122) = 3.60, p = 0.016$ ), putamen ( $F(3,122) = 3.14, p = 0.028$ ), nucleus accumbens ( $F(3,122) = 3.23, p = 0.025$ ), and dorsal ACC ( $F(3,122) = 2.84, p = 0.041$ ), but not the insula ( $F(3,122) = 1.48, p = 0.224$ ) or rostral ACC ( $F(3,122) = 2.37, p = 0.074$ ). These results are consistent with the MANCOVA model that included both current and cumulative depression. Further they are consistent with the regression analyses reported in the main text other than for the rostral ACC, which was trend level in the MANCOVA analyses, but significant in the regressions.

#### Cue Type x Current depression severity

Another MANCOVA only including current depression and covariates of non-interest revealed a significant Cue Type x Current depression interaction only for the nucleus accumbens ( $F(3,122) = 4.84, p = 0.003$ ), and not for the cortico-striatal circuit ( $F(3,122) = 0.82, p = 0.483$ ), caudate ( $F(3,122) = 1.493, p = 0.220$ ), putamen ( $F(3,122) = 0.385, p = 0.764$ ), insula ( $F(3,122) = 0.095, p = 0.963$ ), dorsal ACC ( $F(3,122) = 0.155, p = 0.927$ ), or rostral ACC ( $F(3,122) = 1.609, p = 0.191$ ). There were no significant main effects of cumulative depression for any of the ROIs. Again, these results are generally consistent with the MANCOVA model that included both current and cumulative depression. Further they are consistent with the regression analyses reported in the main text.

## REFERENCES

1. Luby JL, Belden AC, Pautsch J, Si X, Spitznagel E. The clinical significance of preschool depression: impairment in functioning and clinical markers of the disorder. *J Affect Disord.* 2009;112(1):111–119.
2. Forbes EE, Olinio TM, Ryan ND, Birmaher B, Axelson D, Moyles DL, et al. Reward-related brain function as a predictor of treatment response in adolescents with major depressive disorder. *Cogn Affect Behav Neurosci.* 2010 Mar 1;10(1):107–18.
3. Forbes EE, Hariri AR, Martin SL, Silk JS, Moyles DL, Fisher PM, et al. Altered Striatal Activation Predicting Real-World Positive Affect in Adolescent Major Depressive Disorder. *Am J Psychiatry.* 2009 Jan;166(1):64–73.
4. Forbes EE, Ryan ND, Phillips ML, Manuck SB, Worthman CM, Moyles DL, et al. Healthy Adolescents' Neural Response to Reward: Associations With Puberty, Positive Affect, and Depressive Symptoms. *J Am Acad Child Adolesc Psychiatry.* 2010 Feb;49(2):162-172.e5.
5. Olinio TM, McMakin DL, Morgan JK, Silk JS, Birmaher B, Axelson DA, et al. Reduced reward anticipation in youth at high-risk for unipolar depression: A preliminary study. *Dev Cogn Neurosci.* 2014 Apr;8:55–64.
6. Barch DM, Burgess GC, Harms MP, Petersen SE, Schlaggar BL, Corbetta M, et al. Function in the human connectome: Task-fMRI and individual differences in behavior. *NeuroImage.* 2013 Oct;80:169–89.
7. Glasser MF, Sotiropoulos SN, Wilson JA, Coalson TS, Fischl B, Andersson JL, et al. The minimal preprocessing pipelines for the Human Connectome Project. *NeuroImage.* 2013 Oct;80:105–24.
8. Cox RW. AFNI: Software for Analysis and Visualization of Functional Magnetic Resonance Neuroimages. *Comput Biomed Res.* 1996 Jun;29(3):162–73.
9. Destrieux C, Fischl B, Dale A, Hagren E. Automatic parcellation of human cortical gyri and sulci using standard anatomical nomenclature. *NeuroImage.* 2010 Oct;53(1):1–15.
10. Lancaster JL, Woldorff MG, Parsons LM, Liotti M, Freitas CS, Rainey L, et al. Automated Talairach Atlas labels for functional brain mapping. *Hum Brain Mapp.* 2000 Jul;10(3):120–31.
11. Cox RW. Equitable Thresholding and Clustering: A Novel Method for Functional Magnetic Resonance Imaging Clustering in AFNI. *Brain Connect.* 2019 Sep 1;9(7):529–38.
